# Supplementary material for: The Role of Light–Dark Regulation of the Chloroplast ATP Synthase
Source: PubMed Central journal article supplement (PMC5522872; doi:10.3389/fpls.2017.01248), 2017-07-24
Supplement: Presentation_1.pdf [file Presentation_1.pdf]

## **Supplemental data**

**Supplemental Figure S1.** Effects of extended dark exposure on photosynthetic parameters in Col and *atpc2*, lacking the ATP synthase  $\gamma_2$  protein.

**Supplemental Figure S2.** The effects of reduced ATP synthase activity ( $g_{H^+}$ ) but not redox regulation on the stability of maximal PSII quantum efficiency during extended dark exposure.

**Supplemental Figure S3.** The effects of extended dark exposure on the expression of senescence-related genes and chlorophyll content.

**Supplemental Figure S4.** Expression of representative photosynthesis-related genes under extend dark conditions at 0, 2 and 4 days in wild-type (Ws) and *gamera-1*.

**Supplemental Figure S5.** Visualization of leaf starch accumulation and breakdown.

**Supplemental Table S1.** Gene Specific Primer sets used for RT-PCR.

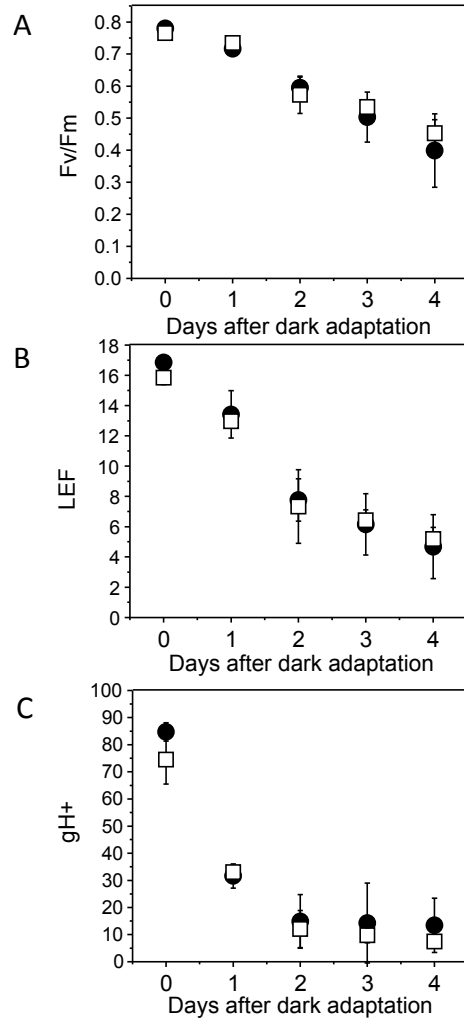

**Supplemental Figure S1.** Effects of extended dark exposure on photosynthetic parameters in Col and *atpc2*, lacking the ATP synthase  $\gamma_2$  protein. Extended dark exposure and photosynthetic measurements were carried as in Main Text Fig. 1, out for 4 days in wild-type (Ws) (black circles), and *atpc2* (white squares). (A) Spectroscopy analysis were performed at different actinic light intensities – dependence of  $F_v/F_m$ , (B) Linear electron flow (LEF), (C) proton conductivity across the thylakoid membrane ( $g_{H^+}$ ) based on ECS decay kinetics. Data presented was the average and standard deviation of results from experiments on 4-5 biological replicates.

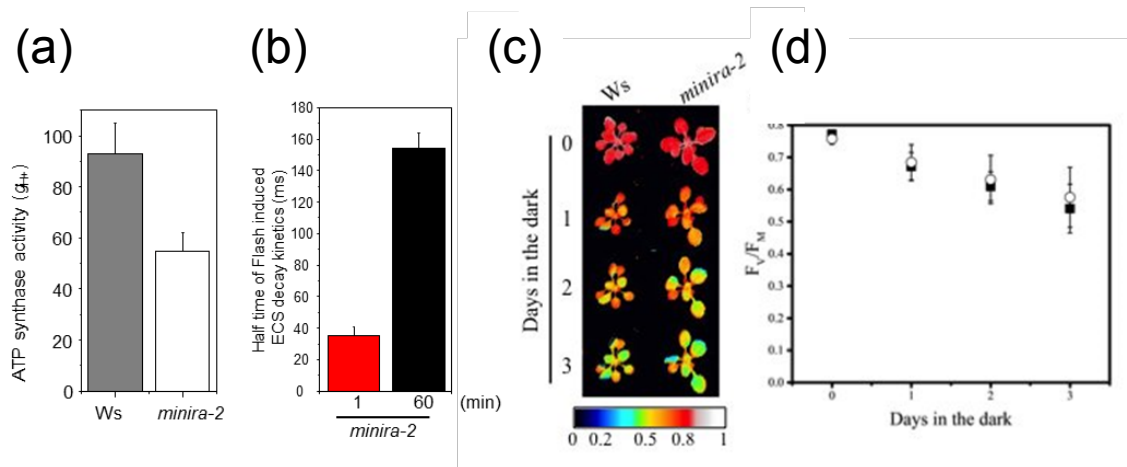

**Supplemental Figure S2.** The effects of reduced ATP synthase activity ( $g_{H+}$ ) but not redox regulation on the stability of maximal PSII quantum efficiency during extended dark exposure. A construct containing a single point mutation between *ATPC1/ATPC2*, P194M (*minira-2*), was made and used to complement *dpa1*, which lacks *ATPC1*. The steady-state ATP synthase activity as estimated by the dark interval relaxation kinetics of the ECS (Ws-gray bar and *minira-2* white bar) showed a decrease of 41% activity from Ws and *minira-2* at 200  $\mu\text{mol photons m}^{-2} \text{s}^{-1}$  PAR (A), similar to the loss of ATP synthase activity in *gamera* (Kohzuma et al. 2012). However, the decay of the flash-induced ECS signals increased upon exposure from 1 (red bar) to 60 (black bar) min of darkness (B), indicating wild type-like redox regulation of the ATP synthase (Kramer and Croft 1989). Measurements of  $F_v/F_M$  were taken once a day during three days of continuous darkness in a DEPI chamber using chlorophyll visual imaging (C) and quantified as described in Figure 1 of the main text (d, n=3). No differences were seen in the loss of  $F_v/F_M$  values over three days in darkness indicating that loss of ATP synthase activity by itself does not alter the decay of PSII during extended darkness (D).

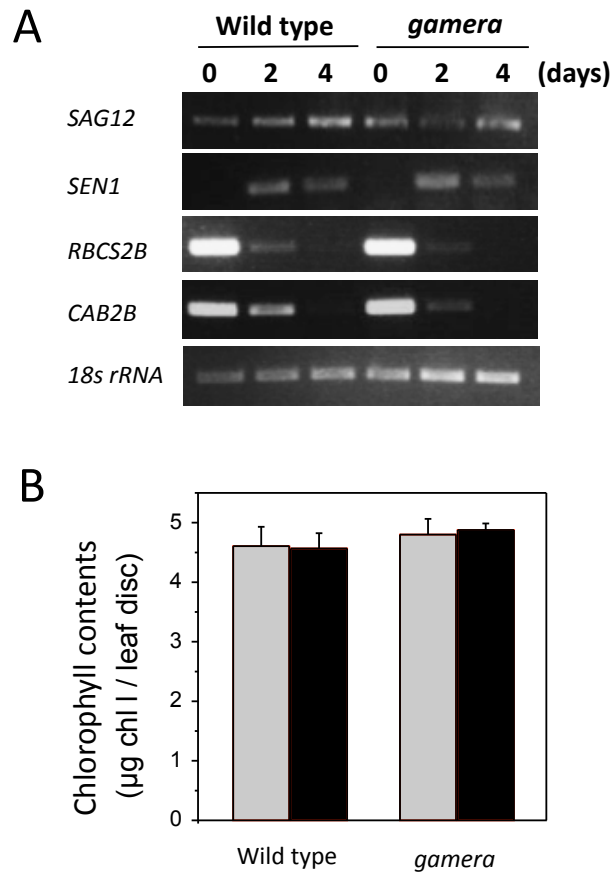

**Supplemental Figure S3.** The effects of extended dark exposure on the expression of senescence-related genes and chlorophyll content. Wild-type (Ws) and *gamera-1* plants were treated as in Fig. 1 and assayed after 0, 2 and 4 days of darkness. **(A)** RT-PCR was performed to monitor expression levels of two classical senescence marker genes, *SAG12* and *SEN1*, as well as two photosynthetic genes, *RBCS2B* and *CAB2B*. 18s rRNA expression level was used as an internal loading control. For more details regarding RT-PCR conditions see Materials and Methods. **(B)** Chlorophyll content was extracted and determined from 6mm diameter leaf discs derived from wild-type and *gamera* plants at 0 day (gray bar) and after 4 days of dark adaption period (dark bar). Reported are averages and standard deviations of 4 biological replicates.

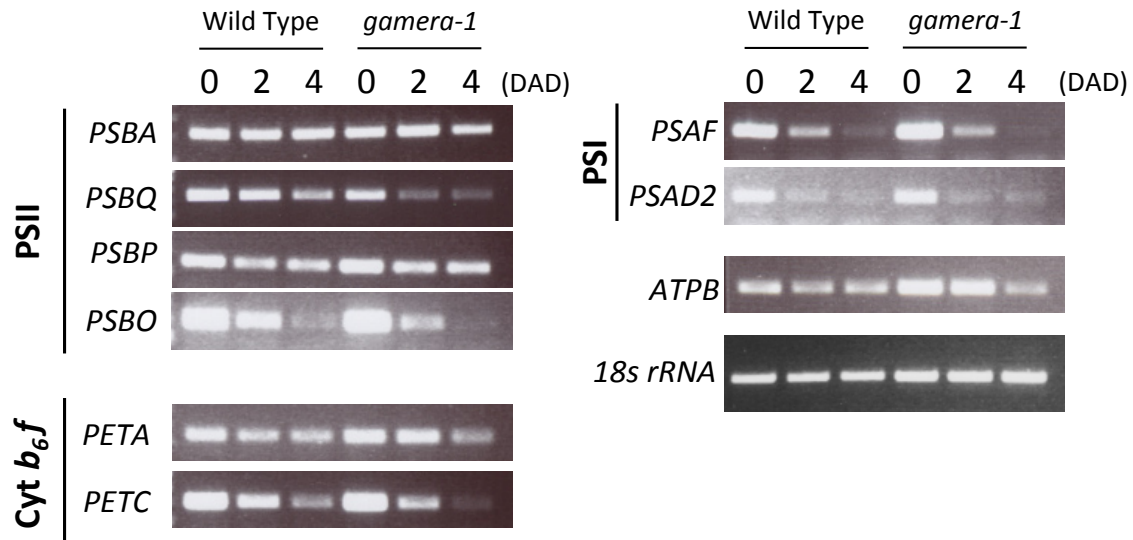

**Supplemental Figure S4.** Expression of representative photosynthesis-related genes under extend dark conditions at 0, 2 and 4 days in wild-type (Ws) and *gamera-1*. RT-PCR was performed using gene specific primers (Primers sets are listed in Supporting Table S1). PCR amplification conditions were determined empirically for each template-primer pair. 18s rRNA was used as an internal standard. For more details regarding RT-PCR conditions see Materials and Methods. Similar results were obtained among three independent experiments.

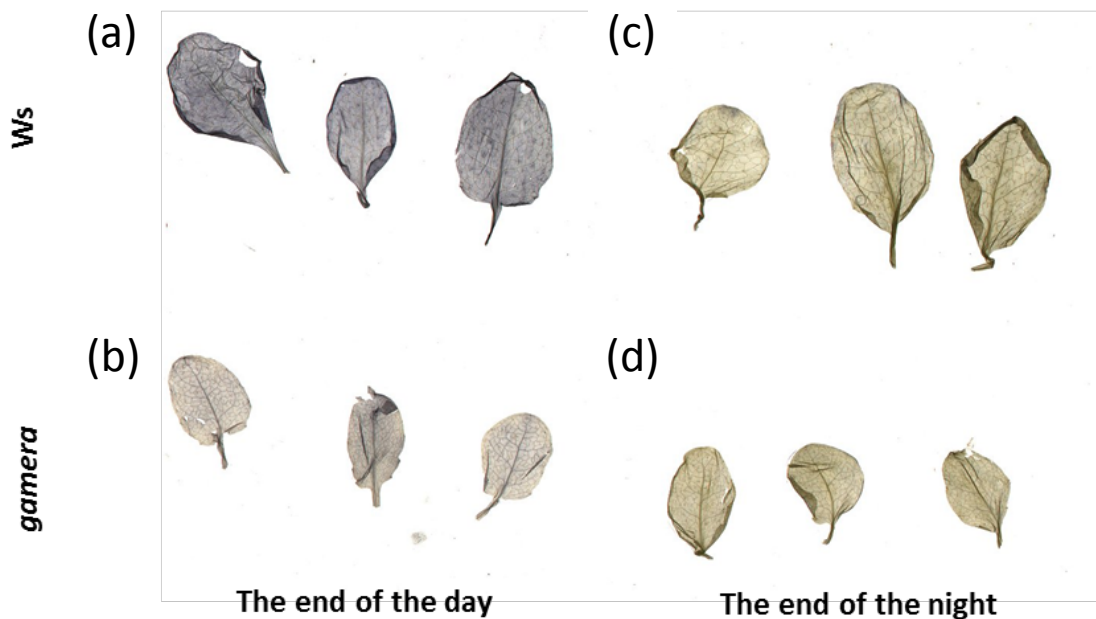

**Supplemental Figure S5.** Visualization of leaf starch accumulation and breakdown. Plants grown under a 16 hr/8 hr light cycle were stained with iodine to visualize starch accumulation 1-hour before the end of the light cycle (the end of the day) in *Ws* (**A**) and *gamera* (**B**). Starch breakdown was similarly visualized 1-hour before the end of the dark cycle (the end of the night) in *Ws* (**C**) and *gamera* (**D**). The lack of iodine staining in the end of the night samples is expected due to the normal breakdown of starch reserves by the end of the normal night period.

**Supplemental Table S1.** Gene Specific Primer sets used for RT-PCR.

RNA was isolated from leaf tissue derived from wild-type and *gamera* plants incubated for extended dark conditions at 0, 2 and 4 days using an RNeasy Plant Mini kit according to protocol supplied by the manufacturer (Qiagen). Isolated RNA was quantitated using Aligent 2100 bioanalyzer. First-strand cDNA was synthesized from 1µg of total RNA using SuperScript<sup>TM</sup>III Reverse Transcriptase according to the manufacturer's protocol (Invitrogen<sup>TM</sup>). PCR reactions were performed using various gene specific primers (Table S1) while PCR amplification conditions were determined empirically for each template-primer pair (Supplemental Figure. S3 and Supplemental Figure. S5).

| Gene Name      | At ID#    | Primer Direction | Sequence                            | Fragment Length (bp) |
|----------------|-----------|------------------|-------------------------------------|----------------------|
| <i>SAG12</i>   | At5g45890 | Forward          | 5'-GATGAAGGCAGTGGCACACCAA-3'        | 333                  |
|                |           | Reverse          | 5'-TCCCACACAAACATACACAATTTAAAAGC-3' |                      |
| <i>SEN1</i>    | At4g35770 | Forward          | 5'-ATCACGAATTGGAAACTGG-3'           | 133                  |
|                |           | Reverse          | 5'-CTTTCCTCCATCGGAAG-3'             |                      |
| <i>RBCS2B</i>  | At5g38420 | Forward          | 5'-ACCTTCTCCGCAACAAGTGG-3'          | 256                  |
|                |           | Reverse          | 5'-GTGAAGCTTGGGGCTTGTAGG-3'         |                      |
| <i>CAB2B</i>   | At1g29920 | Forward          | 5'-TTGAAGGCTACAGAGTCGCAGGAAA-3'     | 290                  |
|                |           | Reverse          | 5'-CACTCACGAAGCAAAGACTGAAGCA-3'     |                      |
| <i>18srRNA</i> | -----     | Forward          | 5'-AACGGCTACCACATCCAAG-3'           | 442                  |
|                |           | Reverse          | 5'GAAGCCAACACAATAGGAT-3'            |                      |
| <i>ATPB</i>    | AtCg00480 | Forward          | 5'-GTAGCAAGAGCACGAAAAAT-3'          | 210                  |
|                |           | Reverse          | 5'-TAAGTTCGTAGCCTTCGCAG-3'          |                      |
| <i>PSBA</i>    | AtCg00020 | Forward          | 5'-CAATATGCTAGTTTCAACAA-3'          | 200                  |
|                |           | Reverse          | 5'-GTTTCATGCATAACTTCCATA-3'         |                      |
| <i>OEC17</i>   | At4g05180 | Forward          | 5'-TAGATTTTACATACAACCAT-3'          | 250                  |
|                |           | Reverse          | 5'-GTCCAAGTTGTCAATGGTTT-3'          |                      |
| <i>OEC23</i>   | At2g30790 | Forward          | 5'-AGCAACTGCAAACATTTTGG-3'          | 150                  |
|                |           | Reverse          | 5'-ATGTAAAGCTTCCACCATT-3'           |                      |
| <i>OEC33</i>   | At5g66570 | Forward          | 5'-ACTTCCTTACCAGTCAAGGC-3'          | 200                  |
|                |           | Reverse          | 5'-TGGAAGTTGGACTGTGACTG-3'          |                      |
| <i>PETA</i>    | AtCg00540 | Forward          | 5'-ATGGACGCGAAGTTATTGAT-3'          | 240                  |
|                |           | Reverse          | 5'-AAGTACTATTTCCGCATCCC-3'          |                      |
| <i>PETC</i>    | At4g03280 | Forward          | 5'-AGGGAGATCCGACTTACCTA-3'          | 200                  |
|                |           | Reverse          | 5'-AGCCAACGCTAGCGACAATG-3'          |                      |
| <i>PSAF</i>    | At1g31330 | Forward          | 5'-GTTTACCGCACTTGATAGTG-3'          | 200                  |
|                |           | Reverse          | 5'-ACCACGGAAGATGATCCGAC-3'          |                      |
| <i>PSAD2</i>   | At1g03130 | Forward          | 5'-AAGTACAAGATCACTTACCA-3'          | 180                  |
|                |           | Reverse          | 5'-TTGTTTCCCAGTGAATTTAA-3'          |                      |
